# Supplementary material for: Electrochemical Redox In-Situ Welding of Silver Nanowire Films with High Transparency and Conductivity
Source: MDPI journal article supplement (doi:10.3390/inorganics10070092), 2022-06-30
Supplement: s1 [file s1]

## Supplementary Data

### Electrochemical redox *in-situ* welding of silver nanowire films with high transparency and conductivity

Wang Zhang, Jia-Shuan Bao, Chen-Hui Xu, Peng-Feng Zhu, Xiang-Liang Pan, and Rui Li\*

#### 1. Supplementary figures

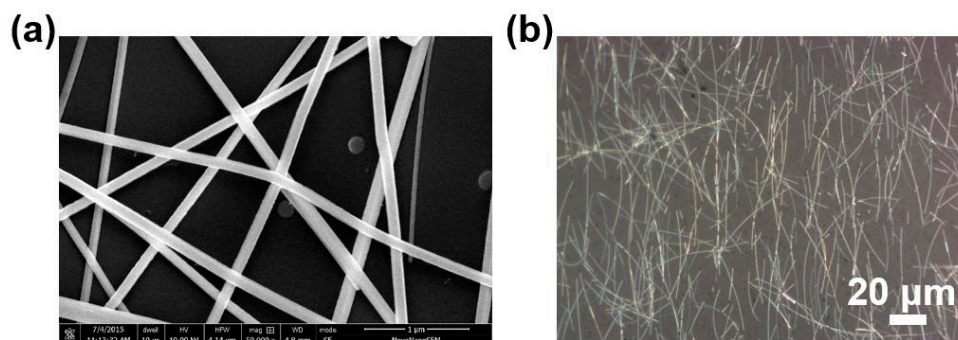

**Fig. S1.** a) SEM and b) optical microscope images of AgNWs

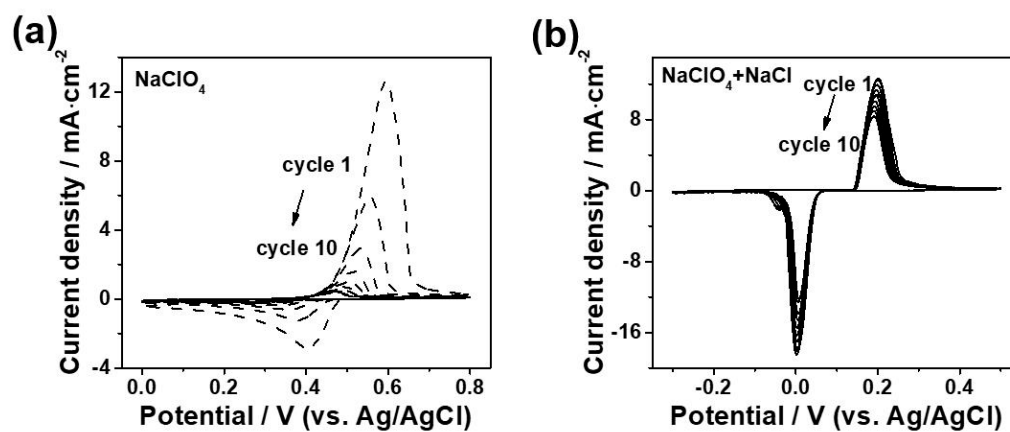

**Fig. S2.** CV curves of AgNWs with a scan rate of  $100 \text{ mV s}^{-1}$  in a  $\text{N}_2$ -saturated  $0.5 \text{ M}$   $\text{NaClO}_4$  without (a) and with (b)  $0.1 \text{ M}$   $\text{NaCl}$ .

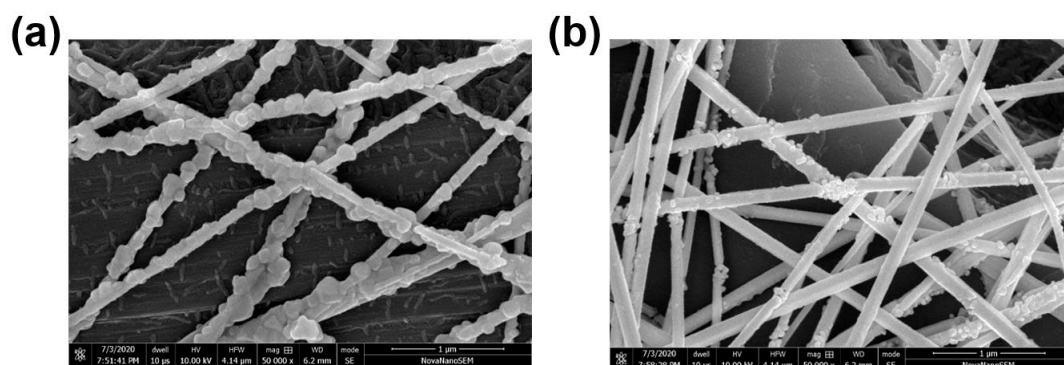

**Fig. S3.** SEM images of AgNWs/CP-Ox (a) and AgNWs/CP-Re (b).

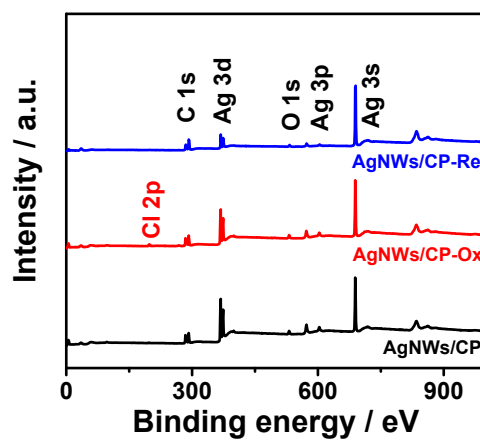

**Fig. S4.** XPS survey spectra of AgNWs/CP, AgNWs/CP-Ox and AgNWs/CP-Re.

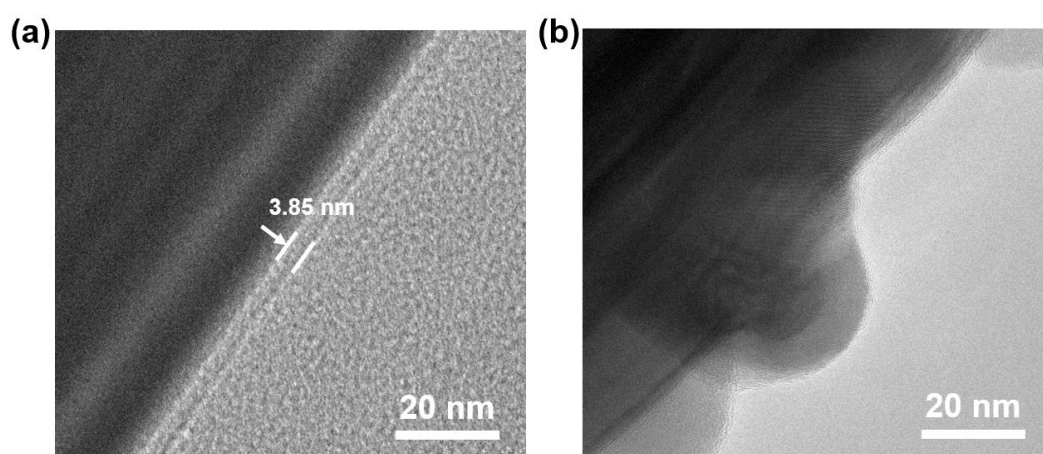

**Fig. S5.** TEM images of pristine AgNWs (a) and oxidized AgNWs (b).

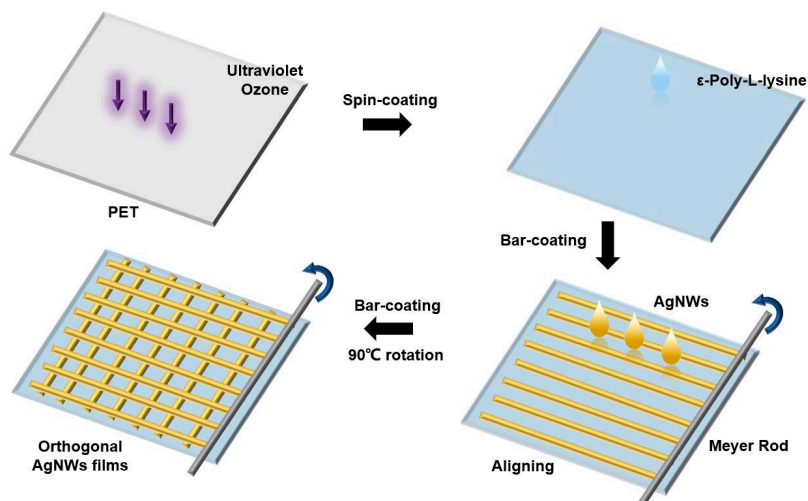

**Fig. S6.** Schematic illustration of the fabrication of cross-aligned AgNW-TCFs.

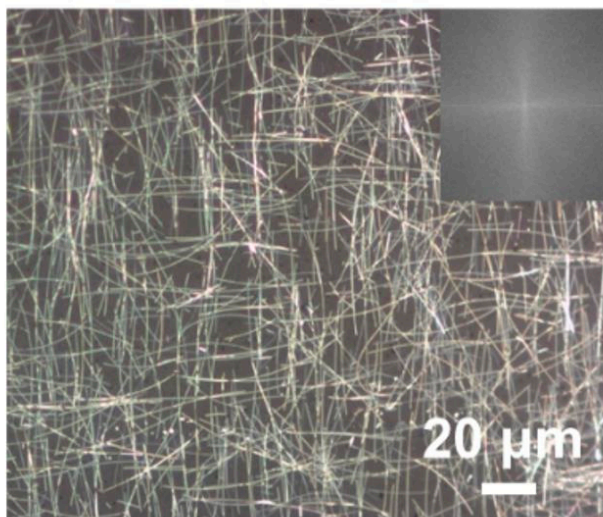

**Fig. S7.** Optical microscope image of a cross-aligned AgNW-TCF. Inset is the fast Fourier transform analyses, showing the orientation and uniformity of the aligned AgNWs.

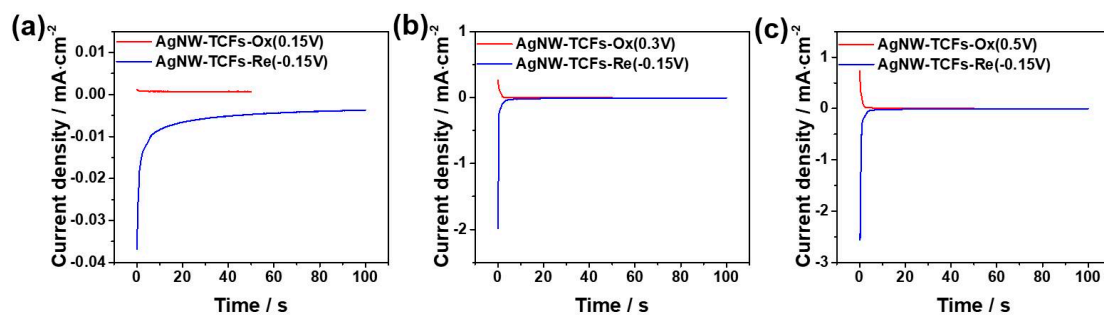

**Fig. S8.** Polarization curves of AgNW-TCFs under different oxidation potentials at 0.15 V (a), 0.3 V (b) and 0.5 V (c) (vs. Ag/AgCl) for 50 s and the same reduction potential at -0.15 V (vs. Ag/AgCl) for 100 s.

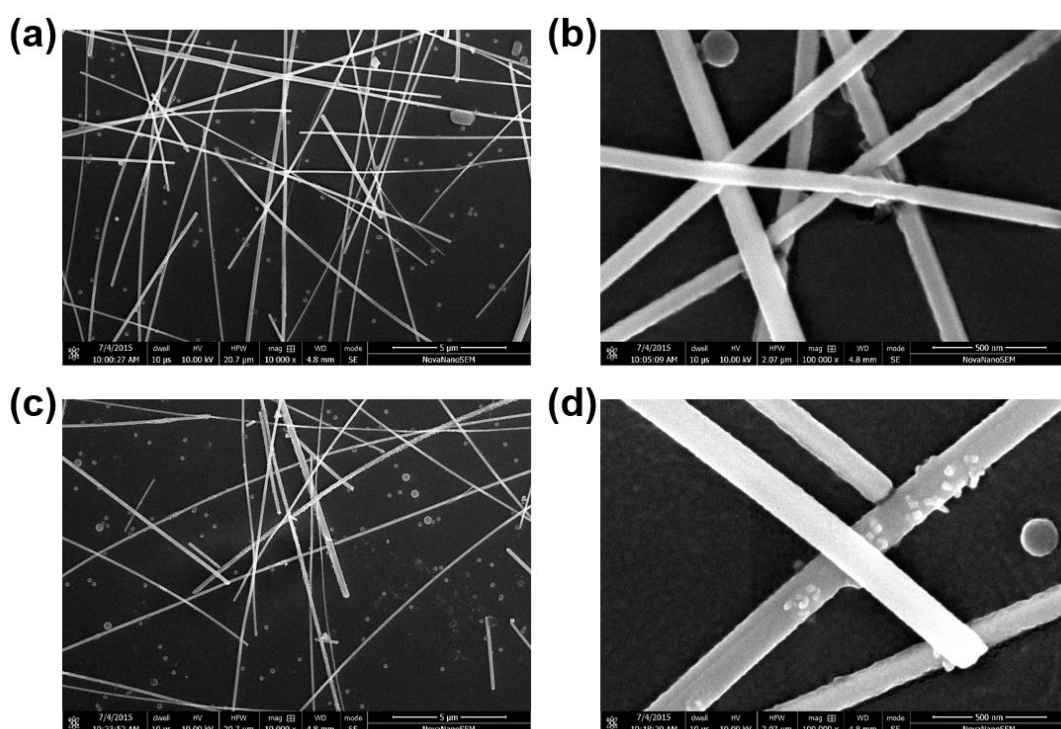

**Fig. S9.** SEM images of AgNW-TCFs oxidated at 0.15 V (vs. Ag/AgCl) (a,b) and reduced at -0.15 V (vs. Ag/AgCl) (c,d).

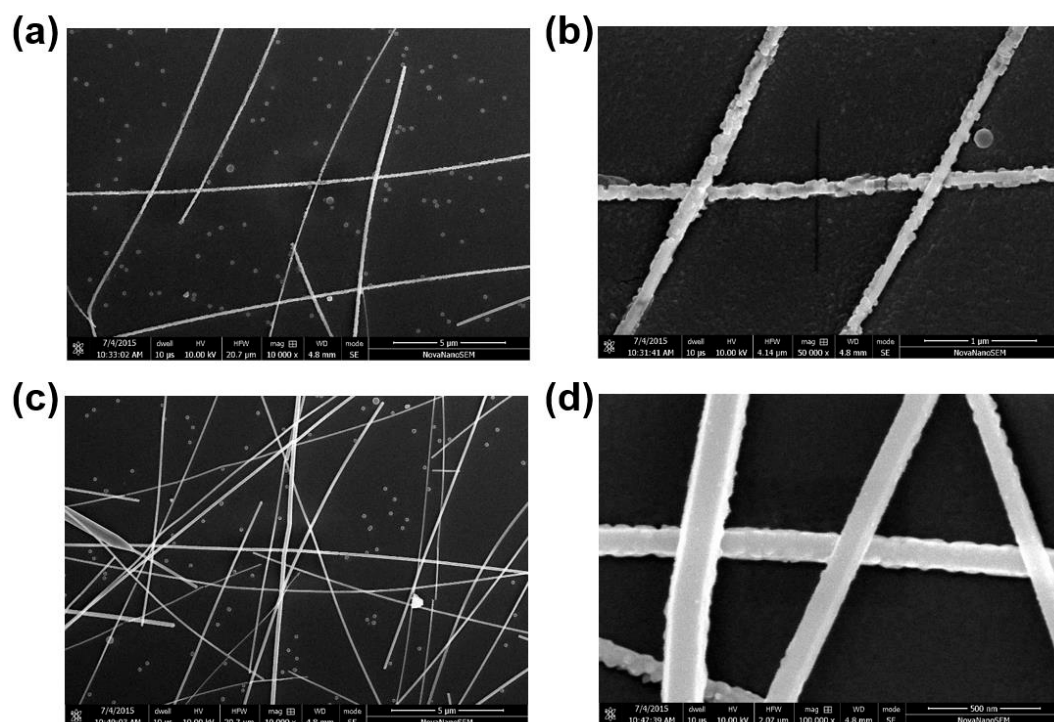

**Fig. S10.** SEM images of AgNW-TCFs oxidated at 0.3 V (vs. Ag/AgCl) (a,b) and reduced at -0.15 V (vs. Ag/AgCl) (c,d).



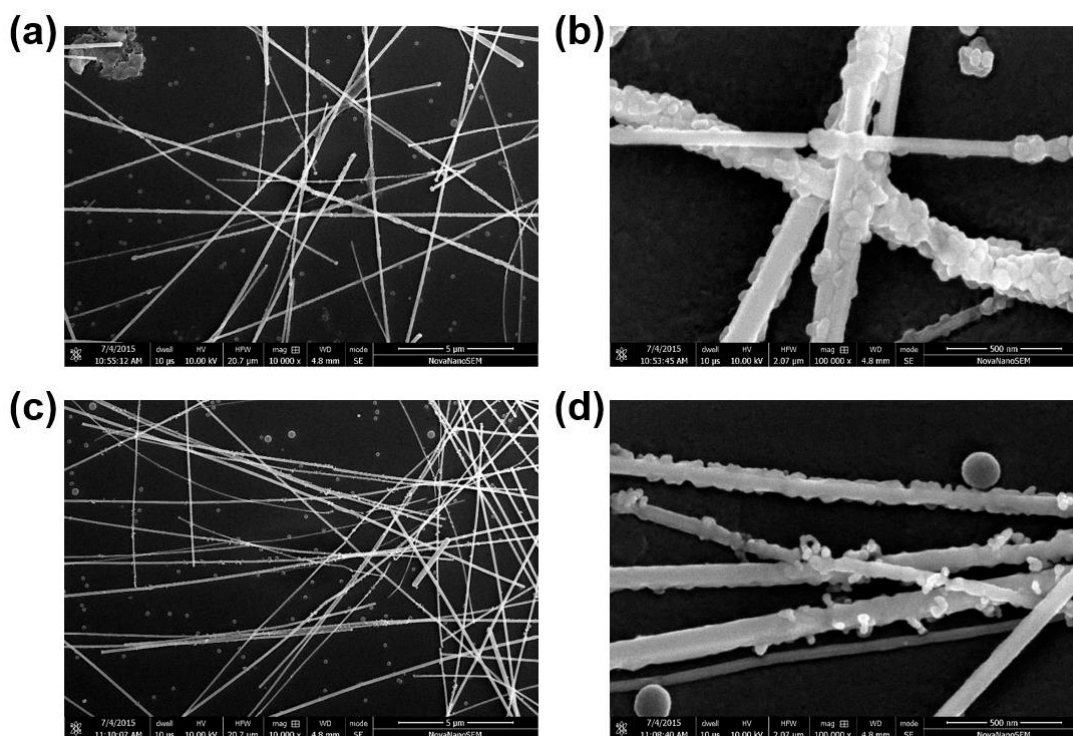

**Fig. S11.** SEM images of AgNW-TCFs oxidated at 0.5 V (vs. Ag/AgCl) (a,b) and reduced at -0.15 V (vs. Ag/AgCl) (c,d).

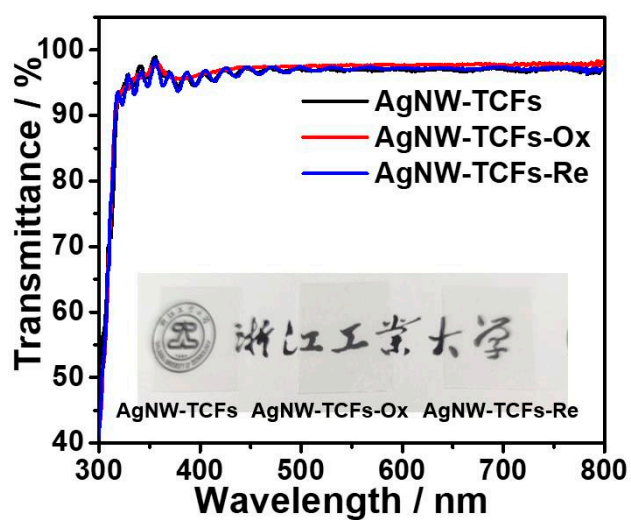

**Fig. S12.** UV-vis spectra and optical photographs of AgNW-TCFs, AgNW-TCFs-Ox and AgNW-TCFs-Re.

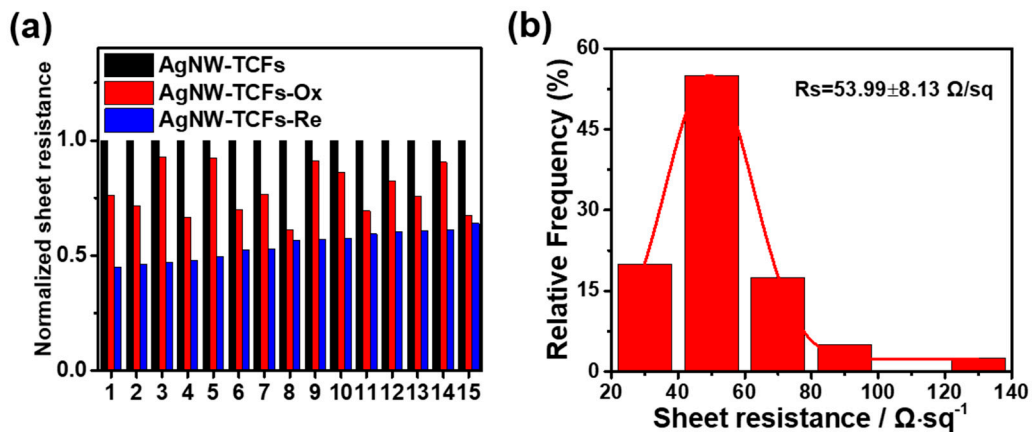

**Fig. S13.** Normalized sheet resistance of AgNW-TCFs, AgNW-TCFs-Ox and AgNW-TCFs-Re for comparing (a); The frequency distribution histogram of sheet resistance for AgNW-TCFs-Re (b).

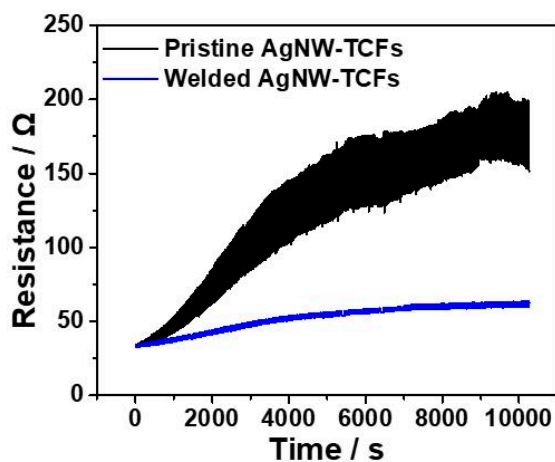

**Fig. S14.** Time-dependent resistance variation for the pristine and welded AgNW-TCFs.

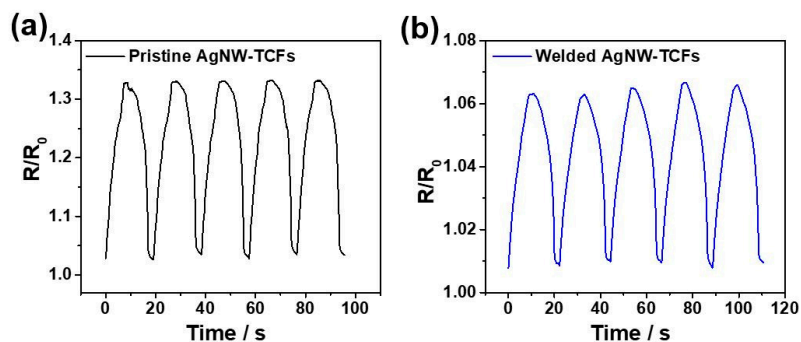

**Fig. S15.** Plots of relative resistance variation ( $R/R_0$ ) as a function of time for the pristine (a) and welded AgNW-TCFs (b).

## 2. Supplementary tables

**Table S1.** Comparing of sheet resistance for AgNW-TCFs, AgNW-TCFs-Ox and AgNW-TCFs-Re.

| Sample | Sheet resistance ( $\Omega/\text{sq}$ ) |              |              |                |
|--------|-----------------------------------------|--------------|--------------|----------------|
|        | AgNW-TCFs                               | AgNW-TCFs-Ox | AgNW-TCFs-Re | $\Delta R/R_0$ |
| 1      | 114.7                                   | 87.5         | 51.72        | -54.91%        |
| 2      | 70                                      | 50.16        | 32.37        | -53.76%        |
| 3      | 87.5                                    | 81.3         | 41.16        | -52.96%        |
| 4      | 108.4                                   | 72.39        | 52.01        | -52.02%        |
| 5      | 144                                     | 133.3        | 71.24        | -50.53%        |
| 6      | 135.43                                  | 94.6         | 71.23        | -47.41%        |
| 7      | 131                                     | 100.4        | 69.27        | -47.12%        |
| 8      | 73.6                                    | 44.98        | 41.57        | -43.52%        |
| 9      | 91.7                                    | 83.5         | 52.44        | -42.81%        |
| 10     | 90.34                                   | 77.9         | 51.83        | -42.63%        |
| 11     | 115.6                                   | 80.3         | 68.64        | -40.62%        |
| 12     | 151.86                                  | 125.1        | 91.99        | -39.42%        |
| 13     | 52.77                                   | 39.92        | 32.03        | -39.30%        |
| 14     | 55.61                                   | 50.36        | 34.1         | -38.68%        |
| 15     | 103.9                                   | 69.9         | 66.4         | -36.09%        |

**Table S2.** Electrical properties at five data points in a CAFM deflection image of AgNW-TCFs, AgNW-TCFs-Ox and AgNW-TCFs-Re.

| Electrical Property                      | Sample       | I    | II   | III  | IV   | V    | Average |
|------------------------------------------|--------------|------|------|------|------|------|---------|
| Conductivity<br>( $\mu\text{A V}^{-1}$ ) | AgNW-TCFs    | 632  | 631  | 642  | 644  | 640  | 638     |
|                                          | AgNW-TCFs-Ox | 681  | 675  | 683  | 674  | 674  | 677     |
|                                          | AgNW-TCFs-Re | 832  | 833  | 839  | 838  | 841  | 837     |
| Resistance<br>( $\Omega$ )               | AgNW-TCFs    | 1580 | 1580 | 1560 | 1550 | 1560 | 1570    |
|                                          | AgNW-TCFs-Ox | 1470 | 1480 | 1460 | 1480 | 1480 | 1470    |
|                                          | AgNW-TCFs-Re | 1200 | 1200 | 1190 | 1190 | 1190 | 1190    |
